# Supplementary material for: Surface plasmon-enhanced activity and stability for methanol oxidation on gold caviar-like assembly under solar light
Source: Royal Society of Chemistry journal article supplement (doi:10.1039/c8ta02222d), 2018-01-01
Supplement: c8ta02222d1.pdf [file c8ta02222d1.pdf]

## Supplementary Information

# Surface plasmon-enhanced activity and stability for methanol oxidation on gold caviar-like assembly under solar light

*Yaxing Liu<sup>a,b</sup>, Fuyi Chen<sup>a,b,c,\*</sup>, Qiao Wang<sup>a,c</sup>, Junpeng Wang<sup>a,c</sup>, Jiali Wang<sup>a,c</sup>, and Tesfaye Tadesse Gebremariam<sup>c</sup>*

<sup>a</sup> State Key Laboratory of Solidification Processing, Northwestern Polytechnical University

Xi'an 710072, China

<sup>b</sup> School of Electronics and Information, Northwestern Polytechnical University

Xi'an 710072, China

<sup>c</sup> School of Materials Science and Engineering, Northwestern Polytechnical University

Xi'an 710072, China

### Corresponding author:

\*Fuyi Chen

<sup>a</sup> 127 West Youyi Road Xi'an Shaanxi, 710072 P. R. China.

Tel/Fax: +86-29-88492052

E-mail address: [fuyichen@nwpu.edu.cn](mailto:fuyichen@nwpu.edu.cn)

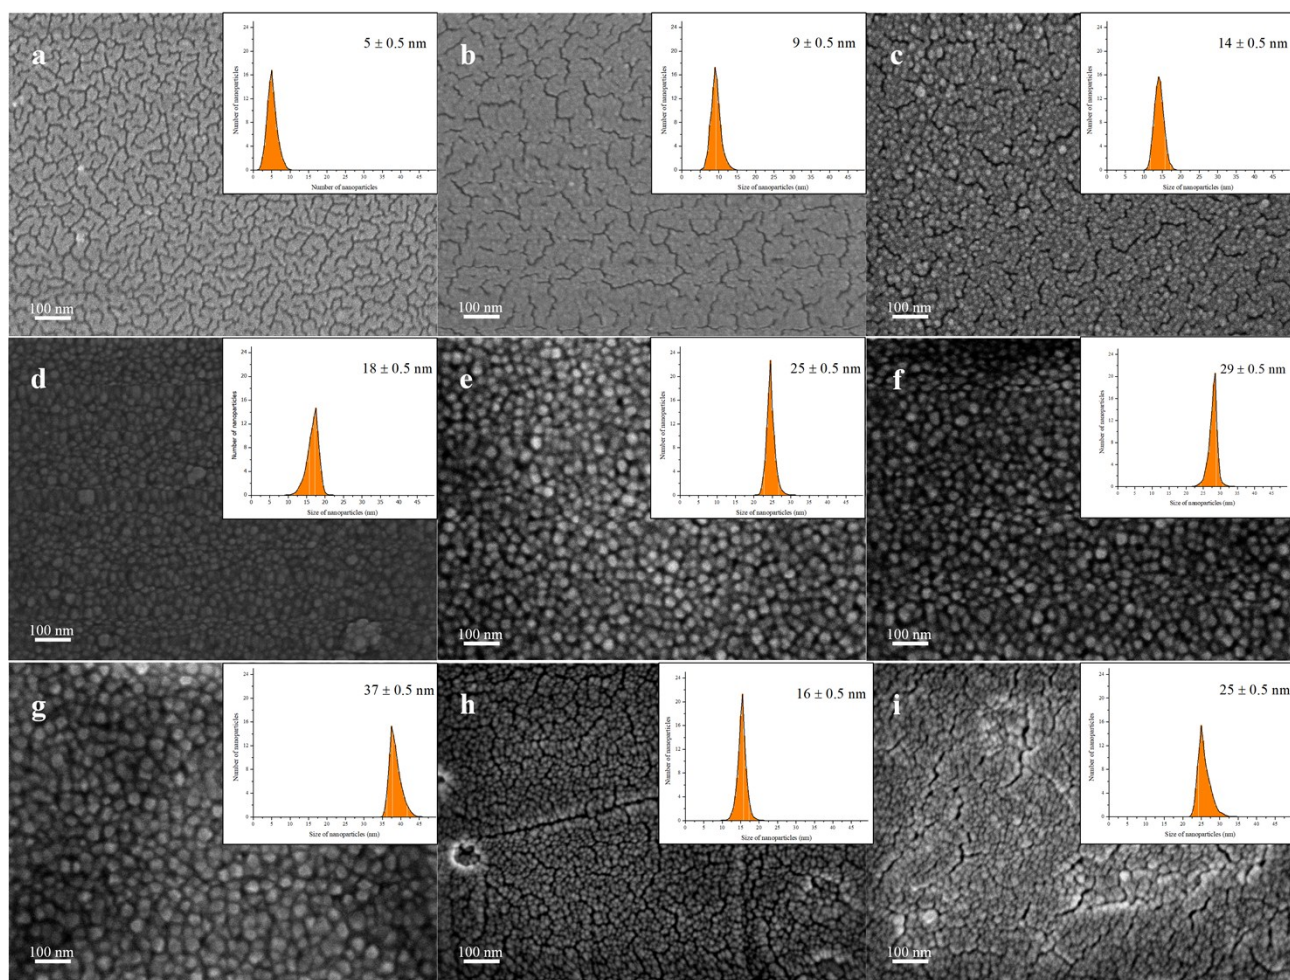

**Figure S1** Morphology characterisation of gold caviar-like assembly (Au-CA). SEM images of Au-CA under the following deposition times: (a) 1T, (b) 2T, (c) 3T, (d) 4T, (e) 5T, (f) 6T, (g) 8T, (h) 10T and (i) 12T. The insets indicate the corresponding size distributions obtained using the Digital Micrograph analysis software from SEM images.

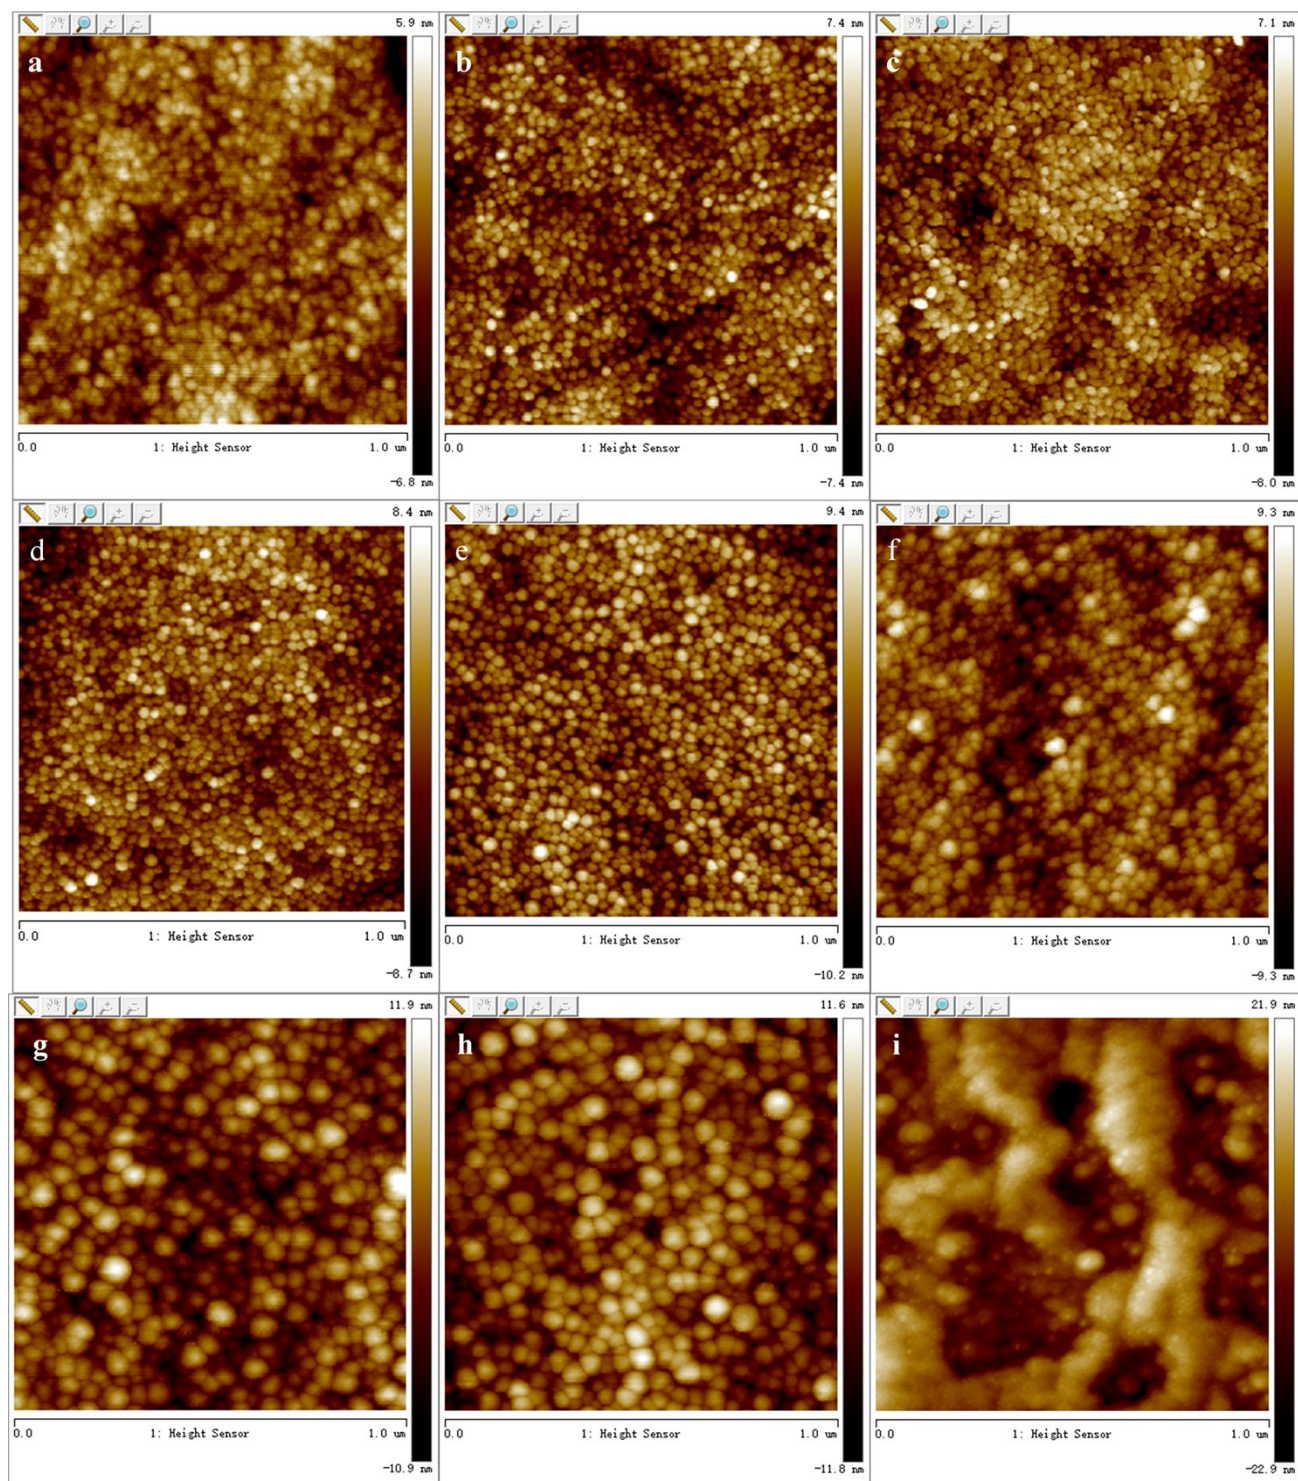

**Figure S2** Morphology characterisation of Au-CA. Tapping-mode AFM images of Au-CA under the following deposition times: (a) 1T, (b) 2T, (c) 3T, (d) 4T, (e) 5T, (f) 6T, (g) 8T, (h) 10T and (i) 12T.



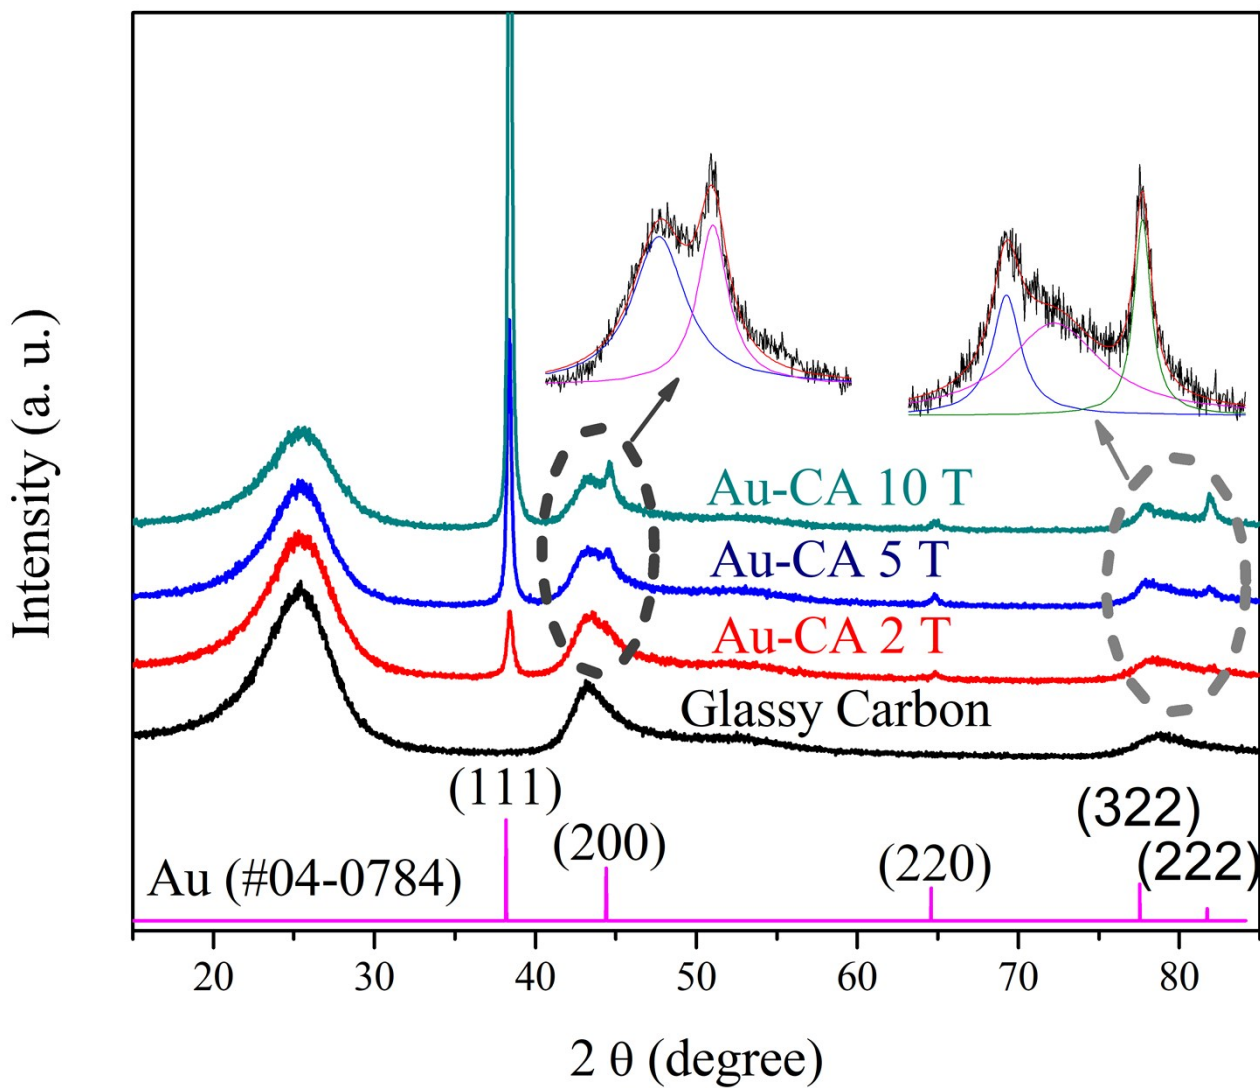

**Figure S3** XRD patterns for the Au-CA and glass carbon. XRD patterns of Au-CA 2T, Au-CA 5T and Au-CA 10T compared with that of glass carbon. The insets indicate the details of the corresponding diffraction peaks. Bar diagram: Au #04-0784.

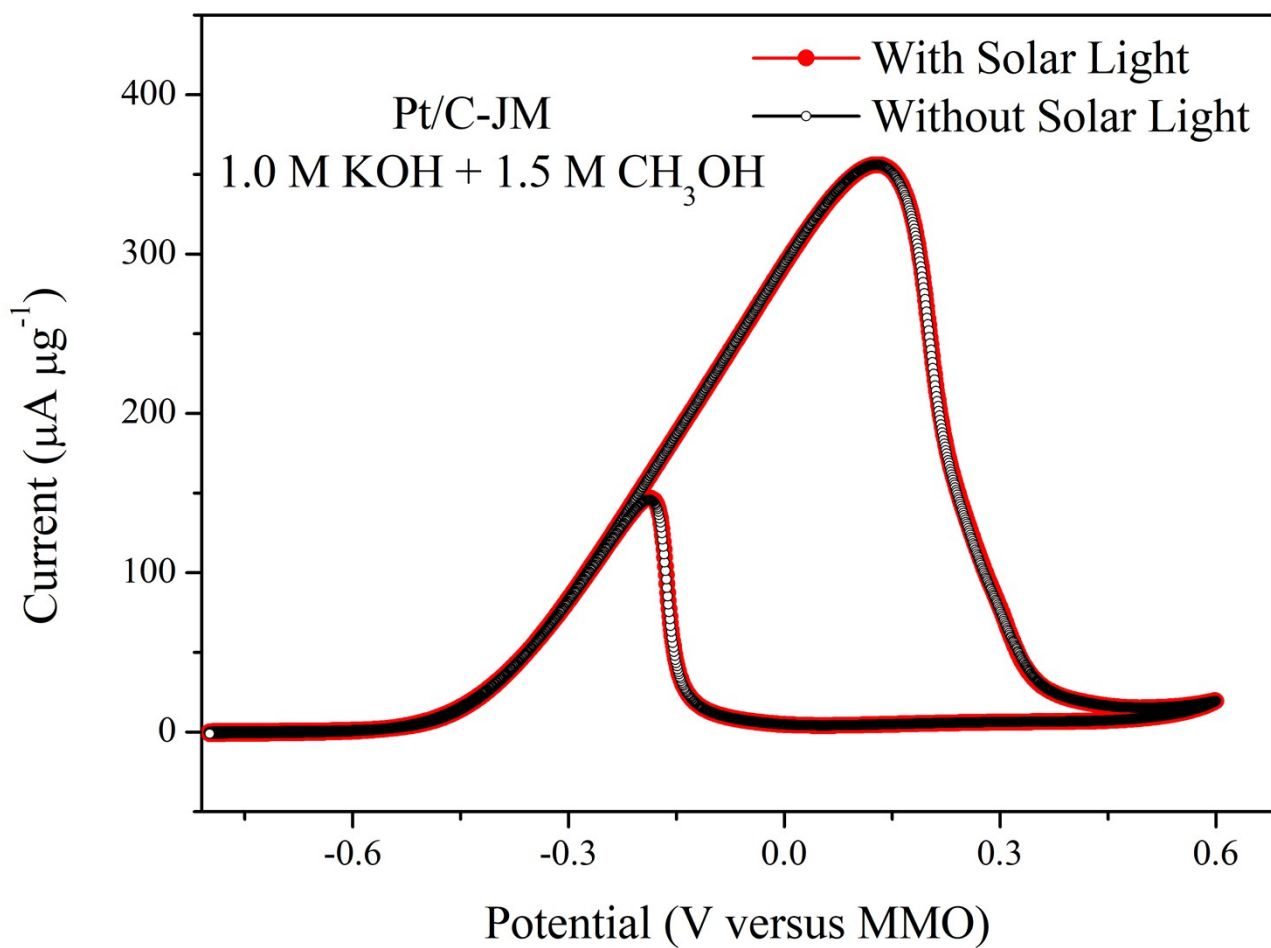

**Figure S4** Effect of simulated solar irradiation on the methanol electrooxidation performance of commercial Pt/C catalyst in a deoxygenated solution of 1.0 M KOH mixed with 1.5 M CH<sub>3</sub>OH.

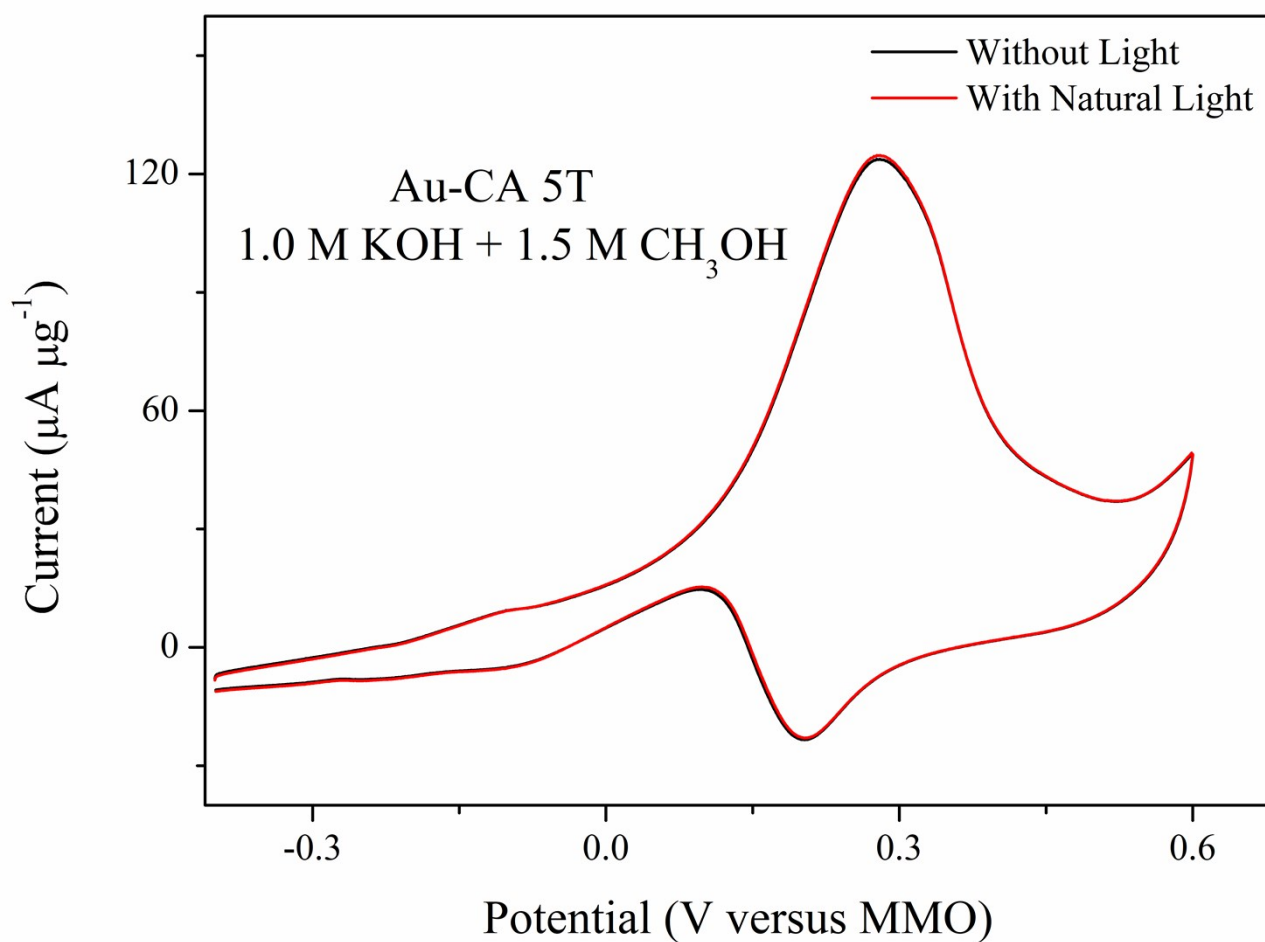

**Figure S5** Effect of the natural light on the methanol electrooxidation performance of Au-CA 5T in a deoxygenated solution of 1.0 M KOH mixed with 1.5 M CH<sub>3</sub>OH.

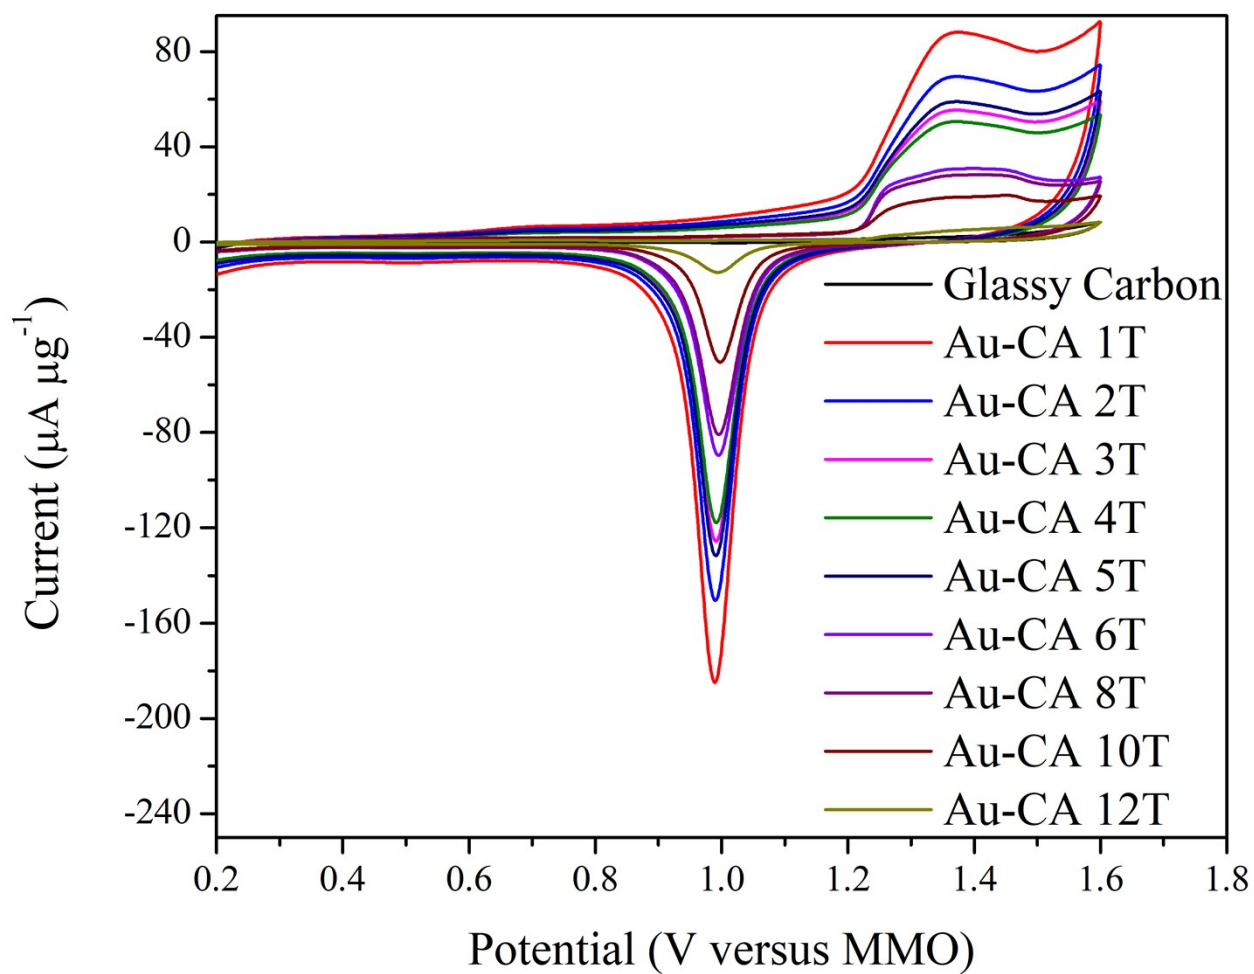

**Figure S6** ECSA characterization. CV curves for glassy carbon and Au-CA under the following deposition times (1T, 2T, 3T, 4T, 5T, 6T, 8T, 10T and 12T) are recorded in  $\text{N}_2$ -saturated 0.5 M  $\text{H}_2\text{SO}_4$  solution with a sweep rate of  $50 \text{ mV s}^{-1}$  and the Hg/HgO electrode used as reference electrode.

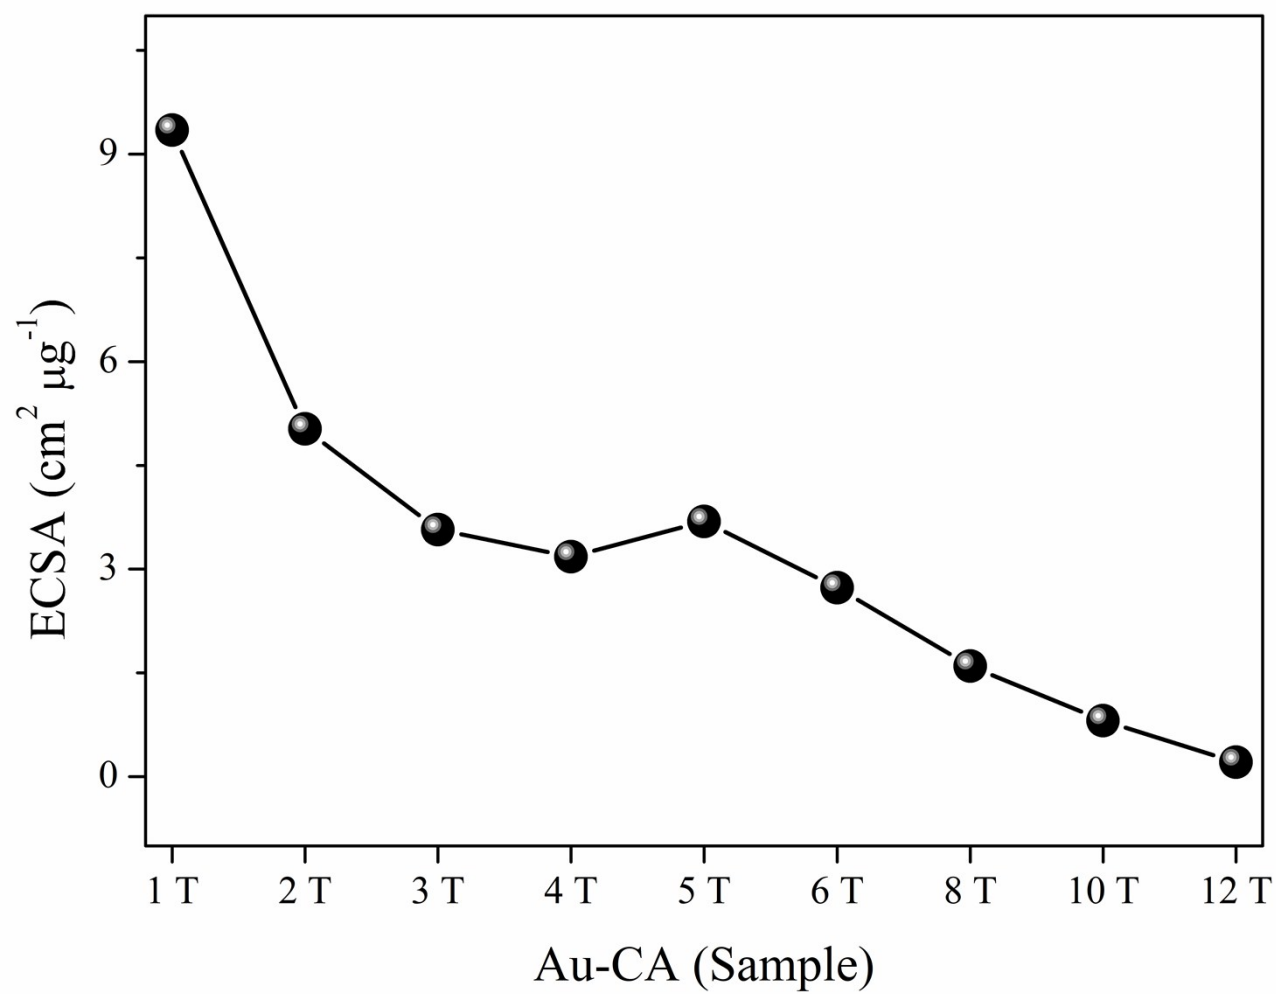

**Figure S7** ECSA values of various Au-CA samples deposited for 1 to 12 times, which are calculated from corresponding CV curves from Figure S6.



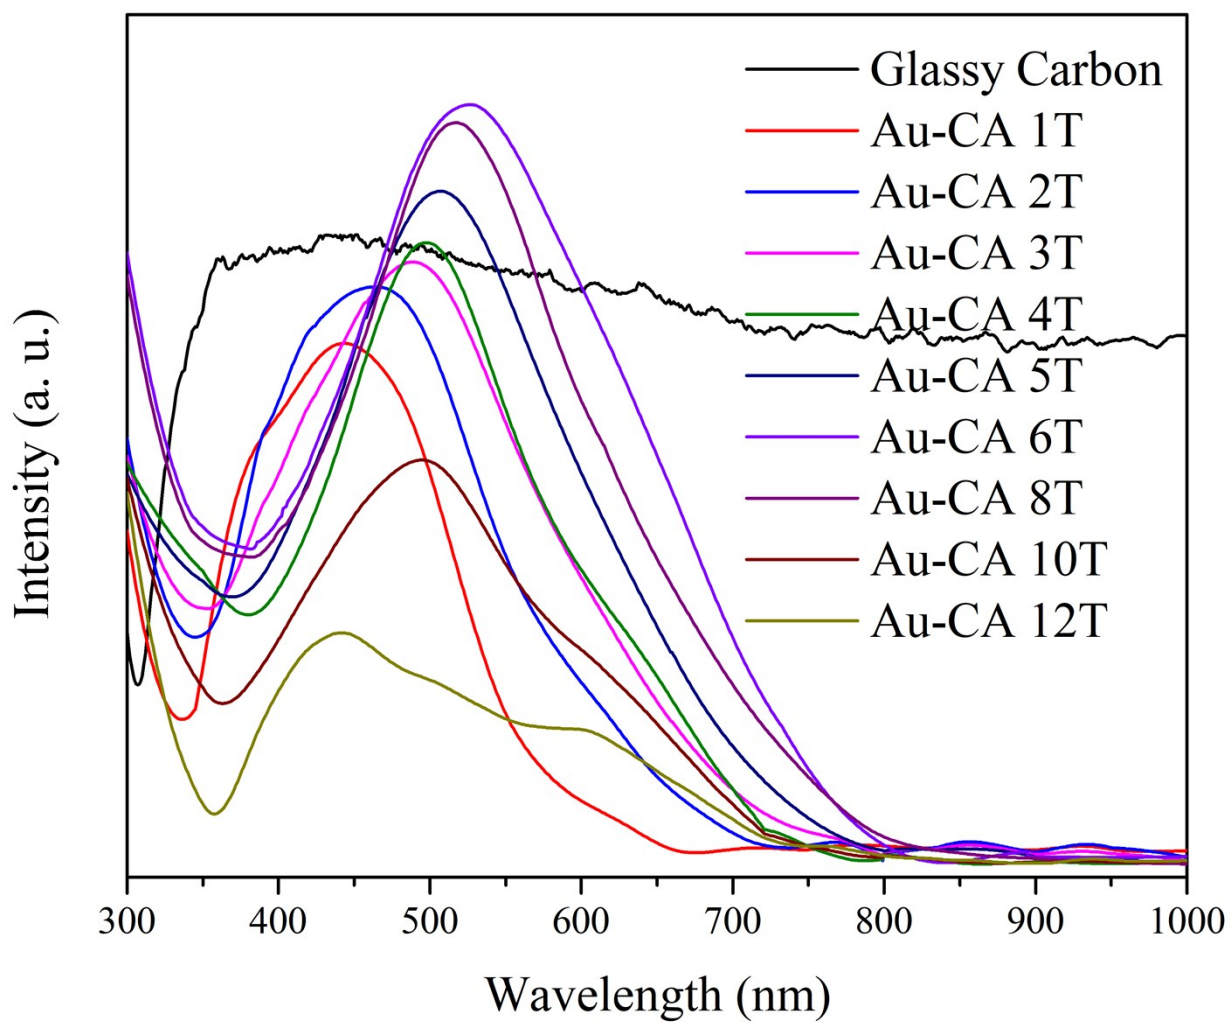

**Figure S8** Diffuse reflectance UV-vis absorption for the Au-CA and glass carbon. Diffuse reflectance UV-vis absorption spectra of glass carbon and Au-CA with various deposition times (1T, 2T, 3T, 4T, 5T, 6T, 8T, 10T and 12 T).

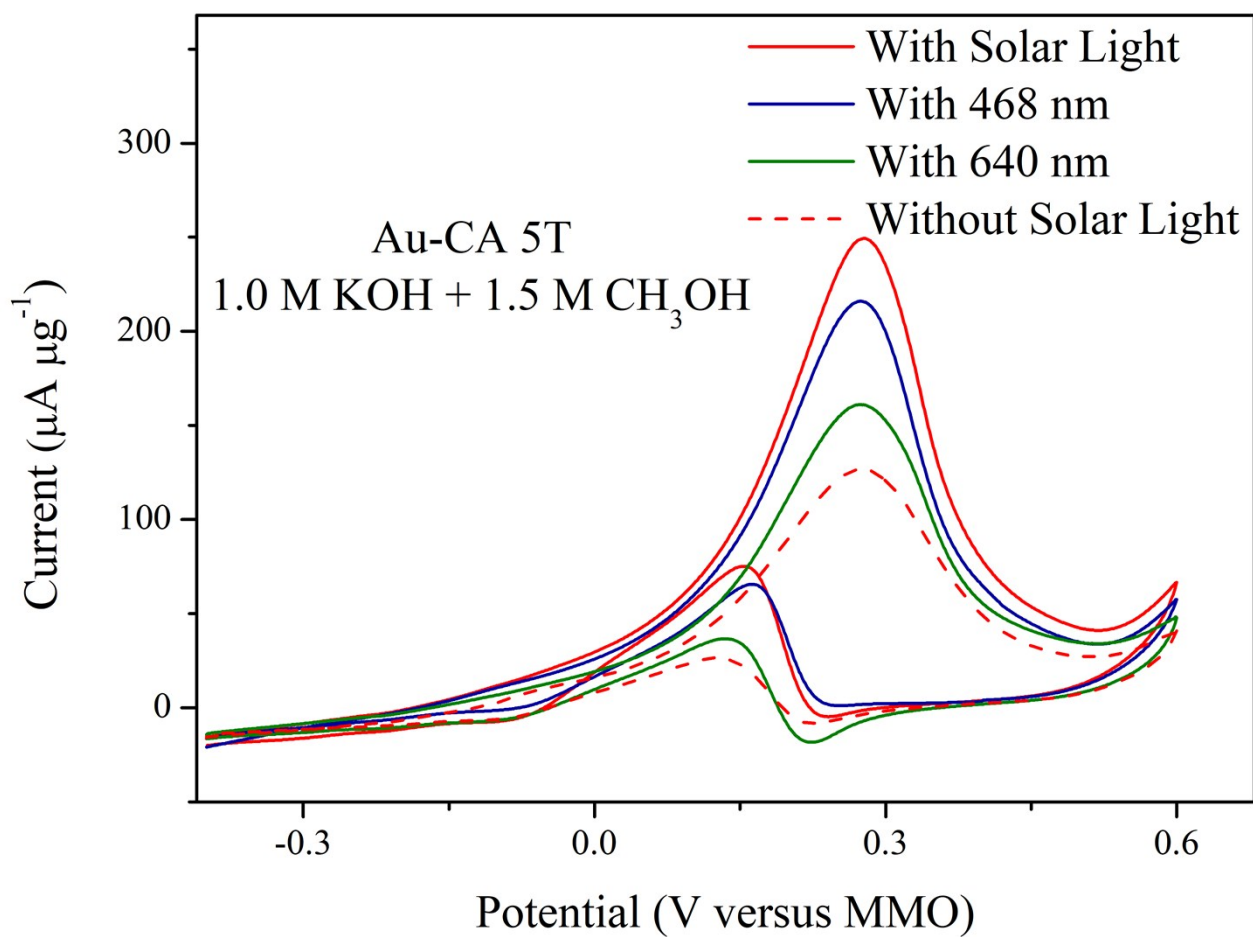

**Figure S9** Effect of the various wavelength light (simulated solar light, LED: 468 nm and LED: 640 nm) on the methanol electrooxidation performance of Au-CA 5T.

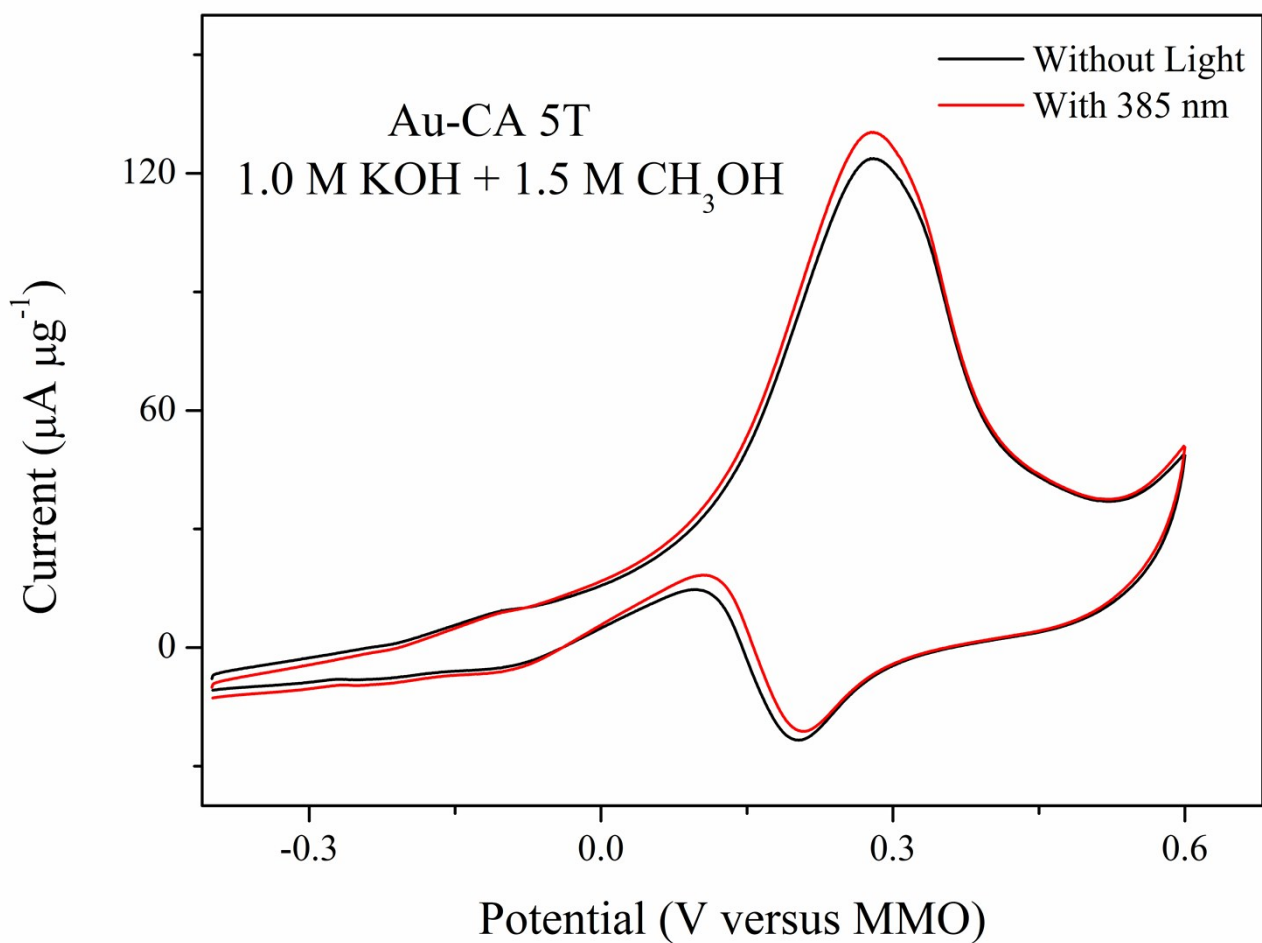

**Figure S10** Effect of the UV light of 385 nm on the methanol electrooxidation performance of Au-CA 5T in a deoxygenated solution of 1.0 M KOH mixed with 1.5 M CH<sub>3</sub>OH.

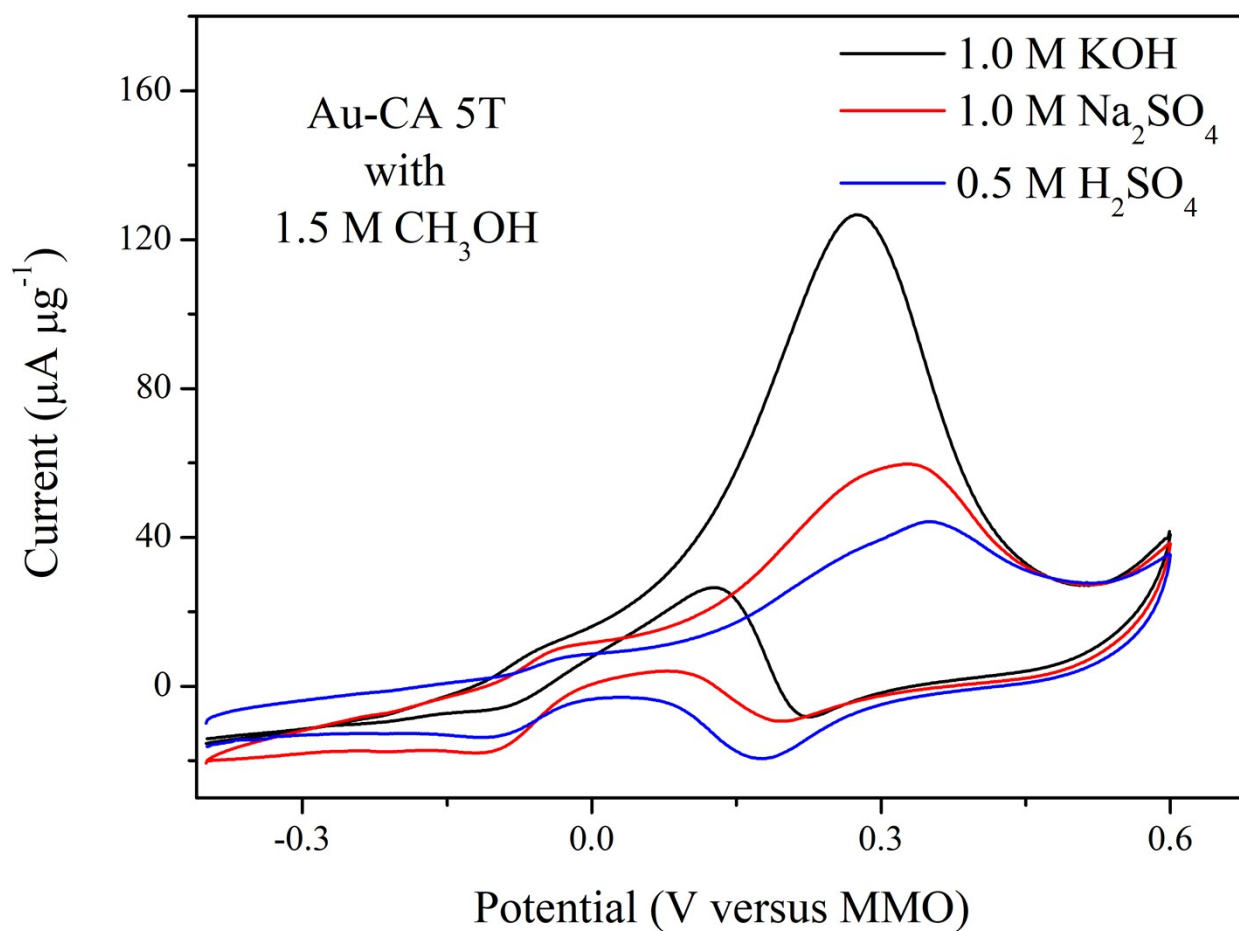

**Figure S11** Effect of the pH value on the methanol electrooxidation capacities of Au-CA 5T in the deoxygenated solutions of 1.0 M KOH, 1.0 M  $\text{Na}_2\text{SO}_4$  and 0.5 M  $\text{H}_2\text{SO}_4$  mixed with 1.5 M  $\text{CH}_3\text{OH}$ , respectively.

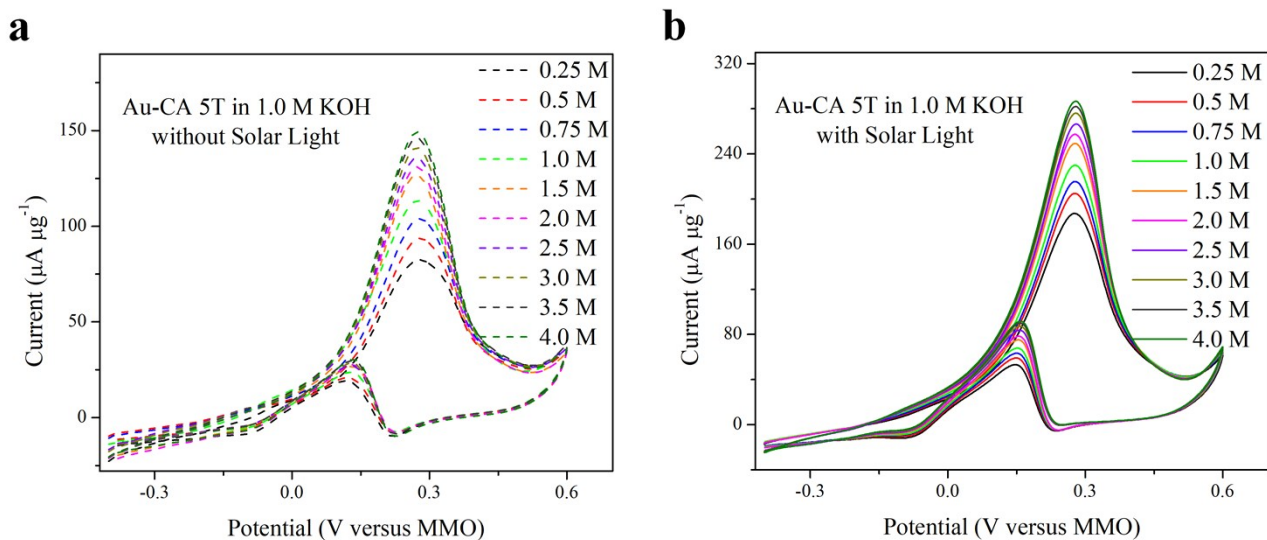

**Figure S12** Effect of simulated solar irradiation on the methanol electrooxidation reaction of Au-CA 5T in deoxygenated solution of 1.0 M KOH with different methanol concentrations. CV curves of Au-CA 5T measured in the absence (a) and presence (b) of simulated solar irradiation in a deoxygenated solution of 1.0 M KOH with different methanol concentrations (0.25, 0.5, 0.75, 1.0, 1.5, 2.0, 2.5, 3.0, 3.5 and 4.0 M).



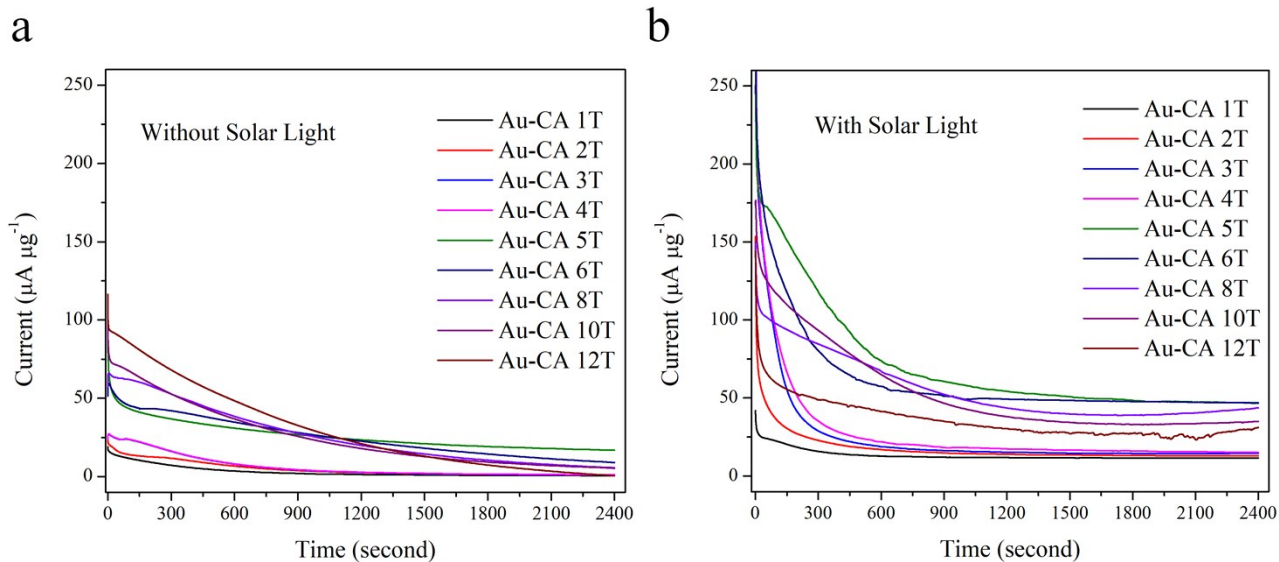

**Figure S13** Solar light effect on the long-term electrooxidation performance of Au-CA under various deposition times. Chronoamperograms of Au-CA under various deposition times (1T, 2T, 3T, 4T, 5T, 6T, 8T, 10T and 12T) in a deoxygenated solution of 1.0 M KOH and 1.5 M CH<sub>3</sub>OH at their oxidation potentials for 40 min in the absence (a) and presence (b) of simulated solar irradiation.

**a**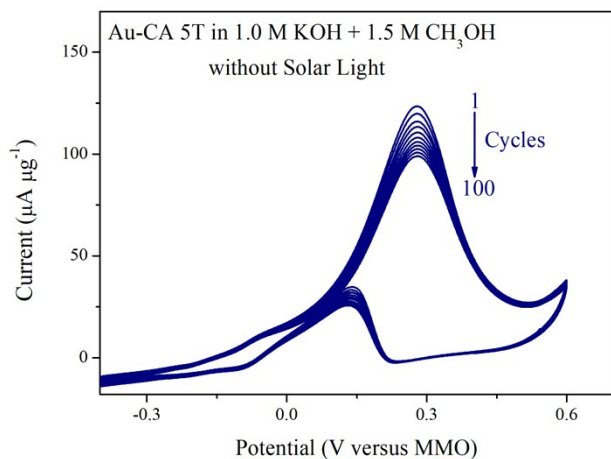**b**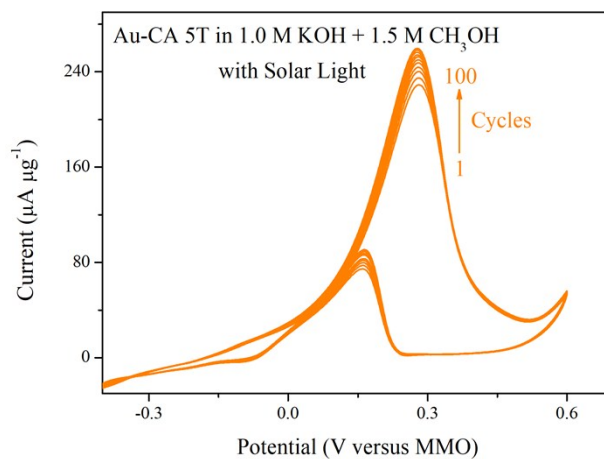

**Figure S14** Effect of simulated solar irradiation on the stability of Au-CA 5T for methanol electrooxidation. CV curves of methanol electrooxidation reaction on Au-CA 5T in the absence (a) and presence (b) of simulated solar irradiation in a deoxygenated solution of 1.0 M KOH and 1.5 M CH<sub>3</sub>OH.
